# Supplementary material for: Multiomics reveals the mechanism of B. longum in promoting the formation of mixed-species biofilms
Source: Royal Society of Chemistry journal article supplement (doi:10.1039/d3fo01751f), 2023-01-01
Supplement: d3fo01751f5.pdf [file d3fo01751f5.pdf]

1

## Supplementary material

### 2 **Multi-omics reveals the mechanism of *B. longum* in promoting the** 3 **formation of mixed-species biofilms**

4 Tao Xu <sup>a,b</sup>, Yue Xiao <sup>a,b</sup>, Hongchao Wang <sup>a,b</sup>, Jinlin Zhu <sup>a,b</sup>, Wenwei Lu <sup>a,b,c,d,\*</sup> and

5 Wei Chen <sup>a,b,f</sup>

6 a. State Key Laboratory of Food Science and Resources, Jiangnan University, Wuxi  
7 214122, China; 6200113219@stu.jiangnan.edu.cn (T.X.); xiaoyue@jiangnan.edu.cn  
8 (Y.X.); hcwang@jiangnan.edu.cn (H.W.); wx\_zjl@jiangnan.edu.cn (J.Z.);  
9 chenwei66@jiangnan.edu.cn (W.C.)

10 b. School of Food Science and Technology, Jiangnan University, Wuxi 214122,  
11 China

12 c. (Yangzhou) Institute of Food Biotechnology, Jiangnan University, Yangzhou  
13 225004, China

14 d. National Engineering Research Center for Functional Food, Jiangnan University,  
15 Wuxi 214122, China

16 \* Correspondence: luwenwei@jiangnan.edu.cn; Tel.: +86-510-85912155

17

18

19

**Table S1.** Detail of 2216E medium/L

| compound           | content | compound                    | content  |
|--------------------|---------|-----------------------------|----------|
| peptone            | 5 g     | potassium bromide           | 0.08 g   |
| yeast              | 1 g     | strontium chloride          | 0.034 g  |
| ferric citrate     | 0.1 g   | boric acid                  | 0.022 g  |
| sodium chloride    | 19.45 g | sodium silicate             | 0.004 g  |
| magnesium chloride | 5.98 g  | Sodium fluoride             | 0.0024 g |
| sodium sulphate    | 3.24 g  | ammonium nitrate            | 0.0016 g |
| calcium chloride   | 1.8 g   | disodium hydrogen phosphate | 0.008 g  |
| potassium chloride | 0.55 g  | sodium carbonate            | 0.16 g   |
| pH 7.6 ± 0.2       |         |                             |          |

20

21

**Table S2.** Detail of AB medium/L

| compound               | content |
|------------------------|---------|
| sodium chloride        | 17.5 g  |
| magnesium sulphate     | 12.3 g  |
| acid-hydrolyzed casein | 2 g     |
| pH 7.5 ± 0.2           |         |

22

23

**Table S3.** Additive of AB medium/L

| compound                       | content |
|--------------------------------|---------|
| 1 M potassium phosphate buffer | 10 mL   |
| 0.1 M arginine solution        | 10 mL   |
| 50% glycerol                   | 20 mL   |
| pH 7.5 ± 0.2                   |         |

24

25

26

Tip: AB medium needs to be mixed with additives

**Table S4:** VIP value of differential metabolites between biofilm groups

| Compound                               | VIP_score |
|----------------------------------------|-----------|
| Acetophenone                           | 7.3333    |
| L-Tyrosine                             | 6.2038    |
| 3-(3,4-dihydroxyphenyl) propanoic acid | 5.7281    |
| 2,6-Xylidine                           | 4.2349    |
| Isoleucine                             | 3.118     |
| Succinic acid                          | 2.9781    |
| Tyramine                               | 2.958     |
| Methylmalonic acid                     | 2.8992    |
| N-Benzylformamide                      | 2.5283    |
| DL-Arginine                            | 2.3854    |
| Adenine                                | 2.2785    |
| L-Glutamic acid                        | 2.1248    |
| L-Pyroglutamic acid                    | 2.113     |
| D-(+)-Tryptophan                       | 1.9657    |

| Compound                                       | VIP_score |
|------------------------------------------------|-----------|
| trans-3-Indoleacrylic acid                     | 1.6582    |
| Leucylproline                                  | 1.6441    |
| 5,6-diphenyl-2,3-dihydropyrazine               | 1.6287    |
| carbamate                                      | 1.5963    |
| 4-Hydroxybenzaldehyde                          | 1.594     |
| Hypoxanthine                                   | 1.5057    |
| Guanine                                        | 1.4819    |
| $\gamma$ -Aminobutyric acid (GABA)             | 1.3981    |
| L-Phenylalanine                                | 1.3482    |
| Dipropylene glycol dimethyl ether              | 1.3299    |
| Palmitic Acid                                  | 1.1818    |
| Valylproline                                   | 1.115     |
| Betaine                                        | 1.1127    |
| D-(+)-Proline                                  | 1.0941    |
| N'-hydroxy-2,5-dimethoxybenzenecarboximidamide | 1.0887    |
| Carnosine                                      | 1.0344    |
| Cordycepin                                     | 1.0216    |
| L-(-)-Methionine                               | 1.0154    |

27

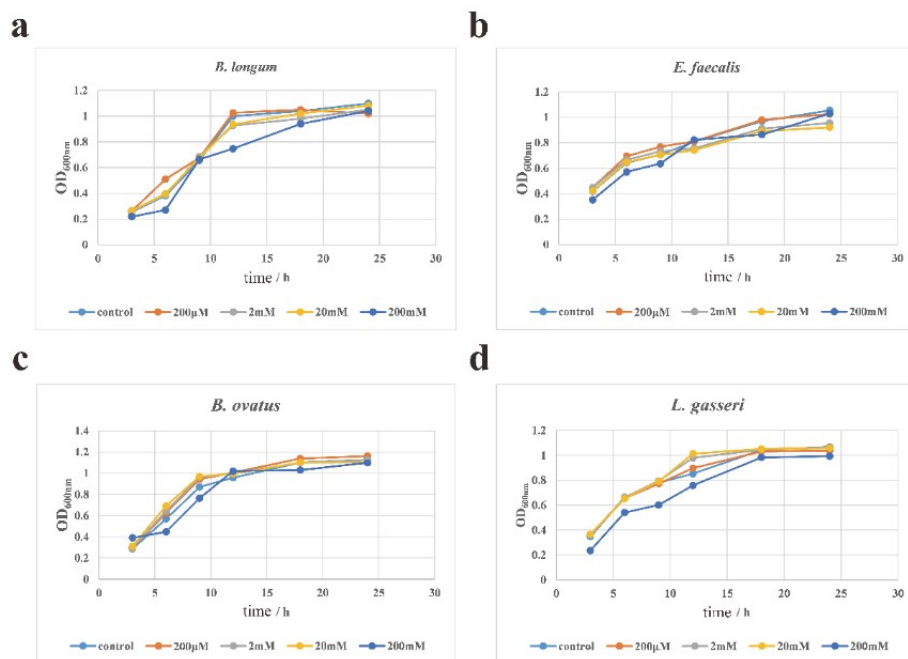

28

29 **Fig S1.** Effect of AI-2 inhibitor on the growth of each strain. (a) *B. longum*, (b) *E. faecalis*, (c) *B.*  
30 *ovatus*, and (d) *L. gasseri*.

31

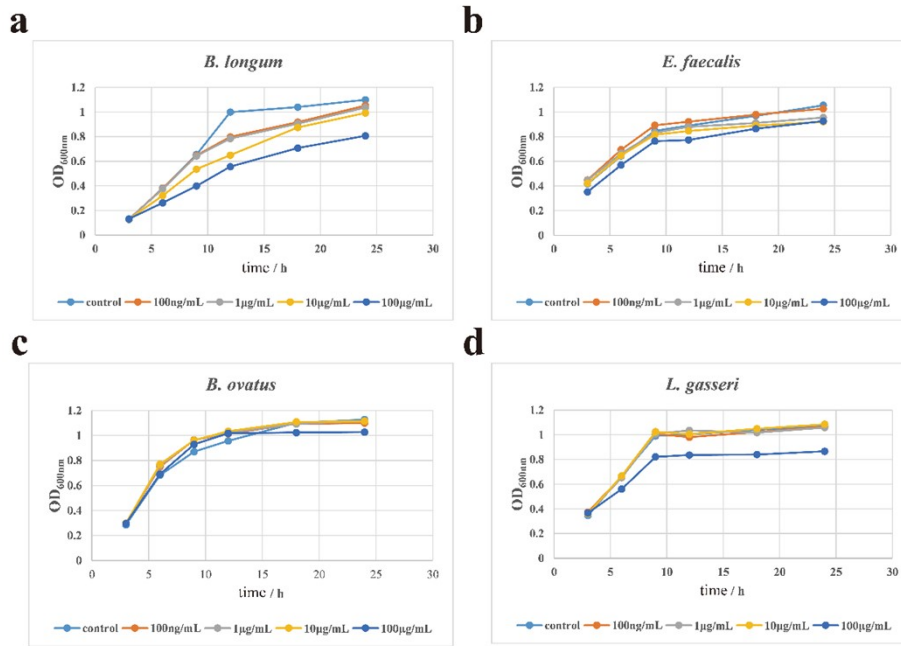

32  
 33 **Fig S2.** Effect of AHLs inhibitor on the growth of each strain. (a) *B. longum*, (b) *E. faecalis*, (c) *B.*  
 34 *ovatus*, and (d) *L. gasseri*.  
 35

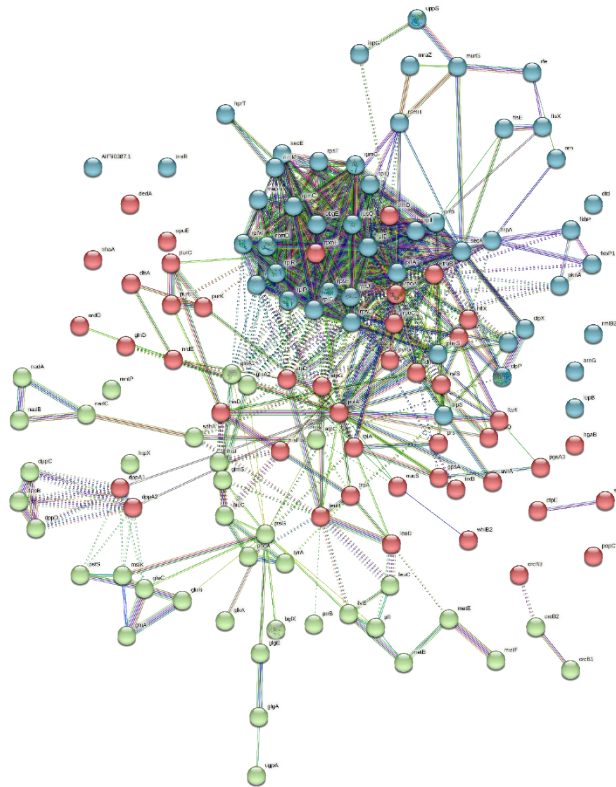

36  
 37 **Fig S3.** Protein-protein interaction (PPI) network of DEGs.
