# Supplementary figures and images for: Multiomics reveals the mechanism of B. longum in promoting the formation of mixed-species biofilms
Source: Royal Society of Chemistry journal article supplement (doi:10.1039/d3fo01751f), 2023-01-01

**a**

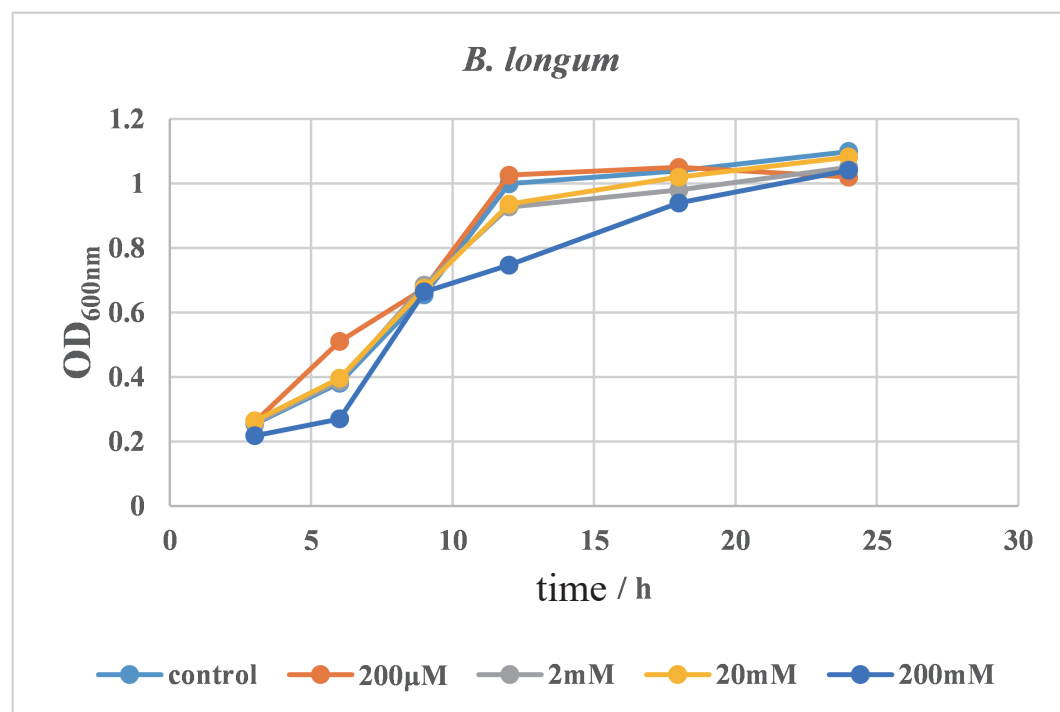

**b**

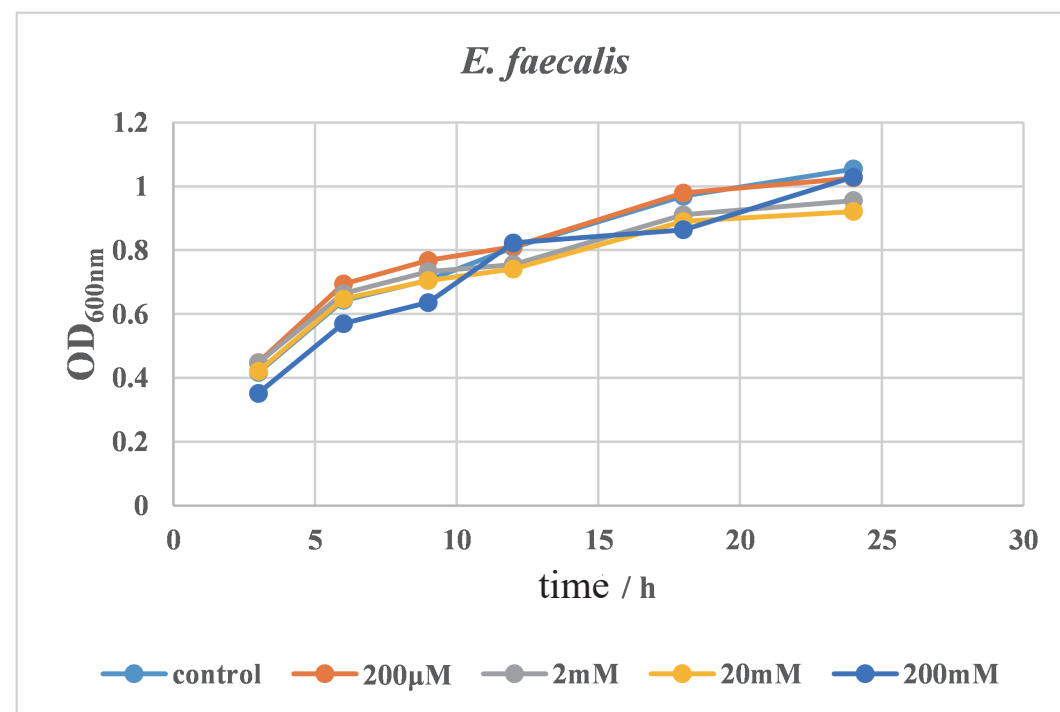

**c**

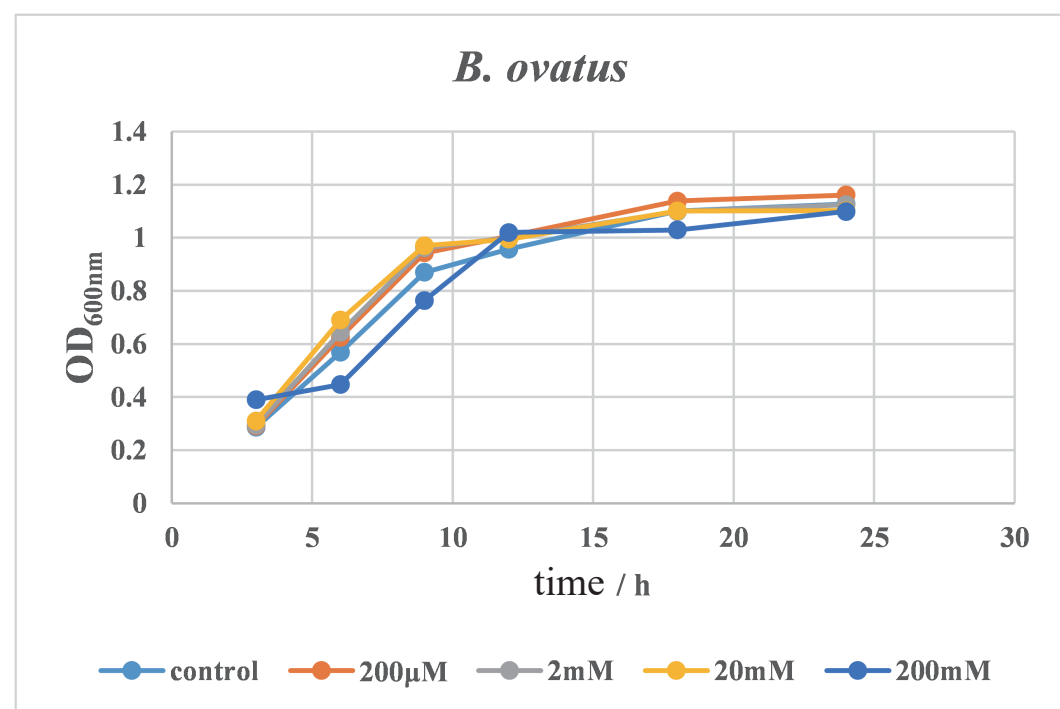

**d**

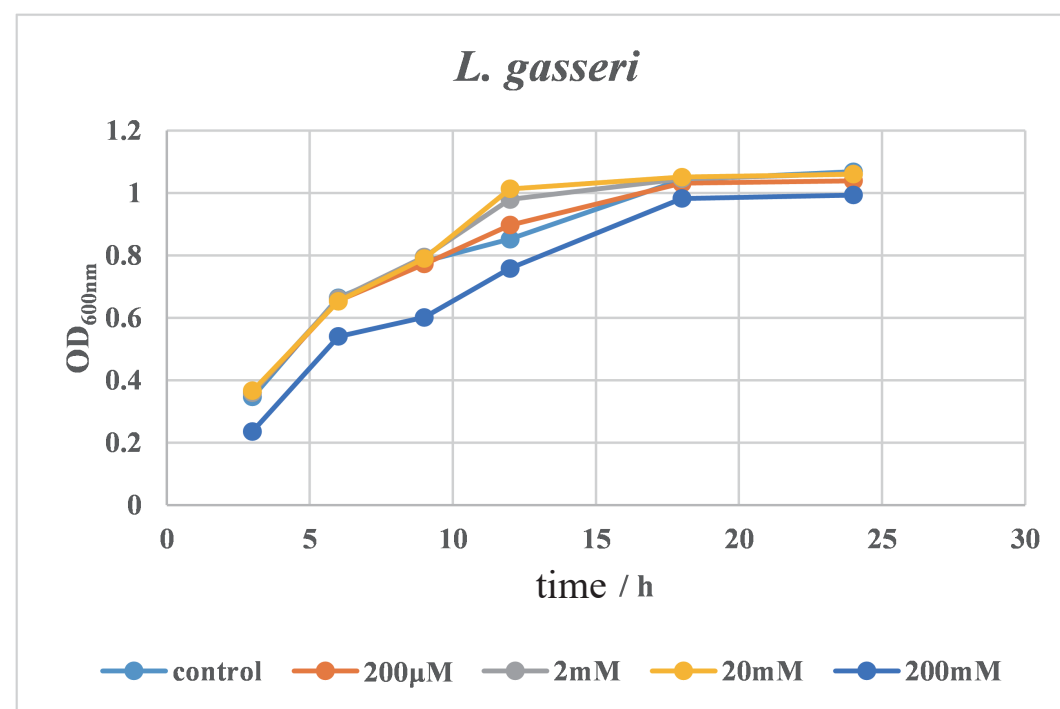

Supplement: d3fo01751f2.pdf [file d3fo01751f2.pdf]

**a**

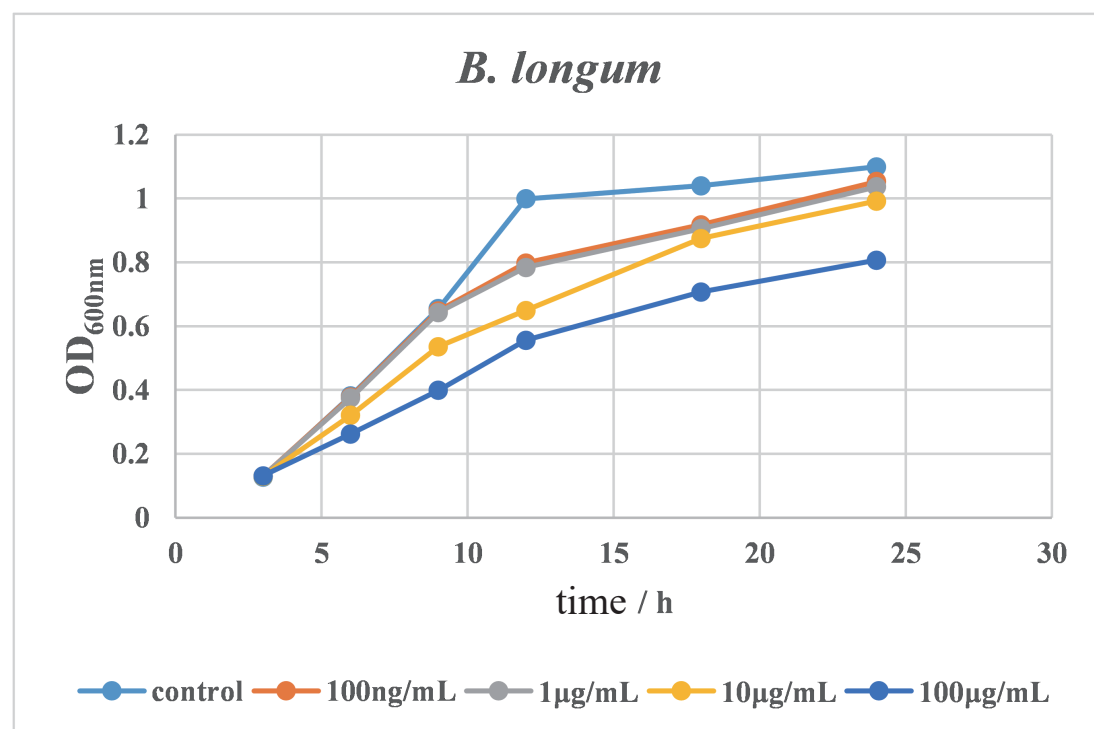

**b**

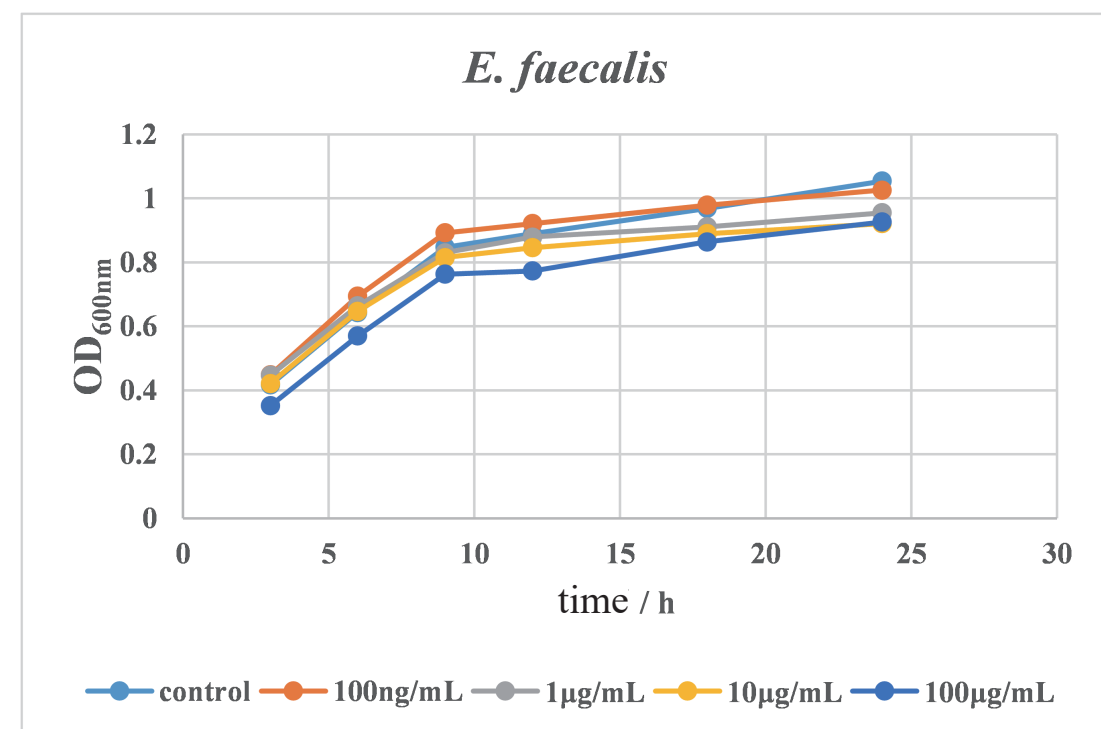

**c**

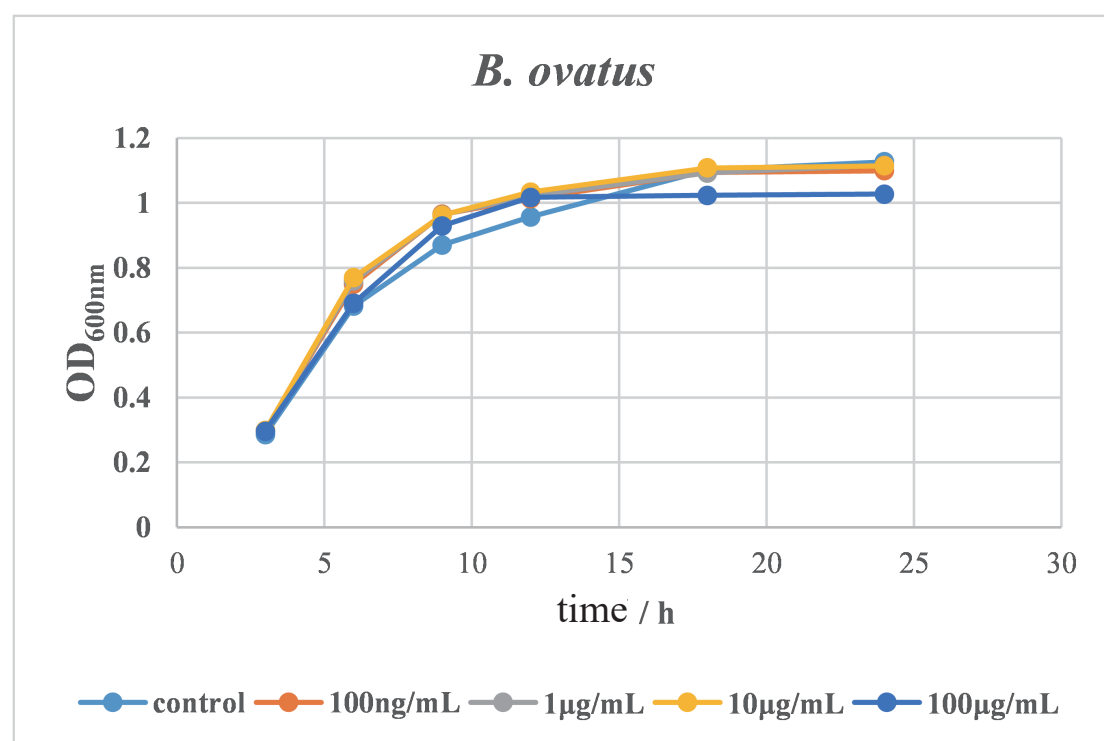

**d**

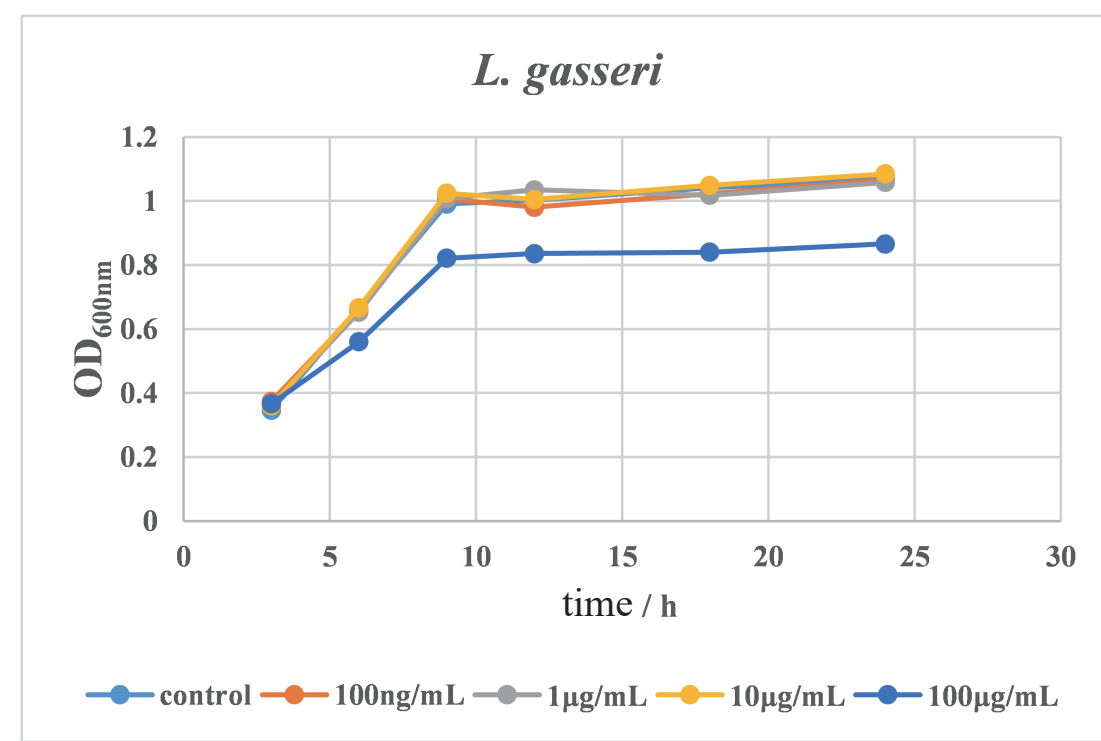

Supplement: d3fo01751f3.pdf [file d3fo01751f3.pdf]
